# Supplementary material for: A novel anodic nanostructured stainless steel-304L oxide as an emerging electrode material for high energy density asymmetric supercapacitors: experimental and DFT insights
Source: Royal Society of Chemistry journal article supplement (doi:10.1039/d5na00618j), 2025-01-01
Supplement: d5na00618j1.pdf [file d5na00618j1.pdf]

## Supplementary Information

### **A novel anodic stainless steel 304-L as an emerging electrode material for high energy density asymmetric supercapacitor: Experimental and DFT studies**

Jawad Ahmad<sup>1†</sup>, Muhammad Danish<sup>1†</sup>, Ghafar Ali<sup>1,5\*</sup>, Maaz Khan<sup>1</sup>, Shahzad Anwar<sup>2</sup>, Gul Rahman<sup>3</sup>, Mashkooor Ahmad<sup>1</sup>, Yi Xie<sup>4</sup>, Seungkuk Cheon<sup>5</sup>, Sung Oh Cho<sup>5</sup>, , Imran Shakir<sup>6</sup>

<sup>1</sup>Nanomaterials Research Group, Physics Division, PINSTECH, Islamabad 45650, Pakistan.

<sup>2</sup>Physics Department, Islamia College University Peshawar, KPK, Pakistan.

<sup>3</sup>Physics Department, Quaid-i-Azam University, Islamabad 45320, Pakistan.

<sup>4</sup>State Key Laboratory of Silicate Materials for Architectures, Wuhan University of Technology, No. 122, Luoshi Road, Wuhan 430070, China.

<sup>5</sup>Department of Nuclear and Quantum Engineering, Korea Advanced Institute of Science and Technology (KAIST), 291 Daehak-ro, Yuseong-gu, Daejeon 34141, Republic of Korea.

\*Corresponding authors: Ghafar Ali, e-mail: [ghafarali@kaist.ac.kr](mailto:ghafarali@kaist.ac.kr)

†Both authors have equal contributions.

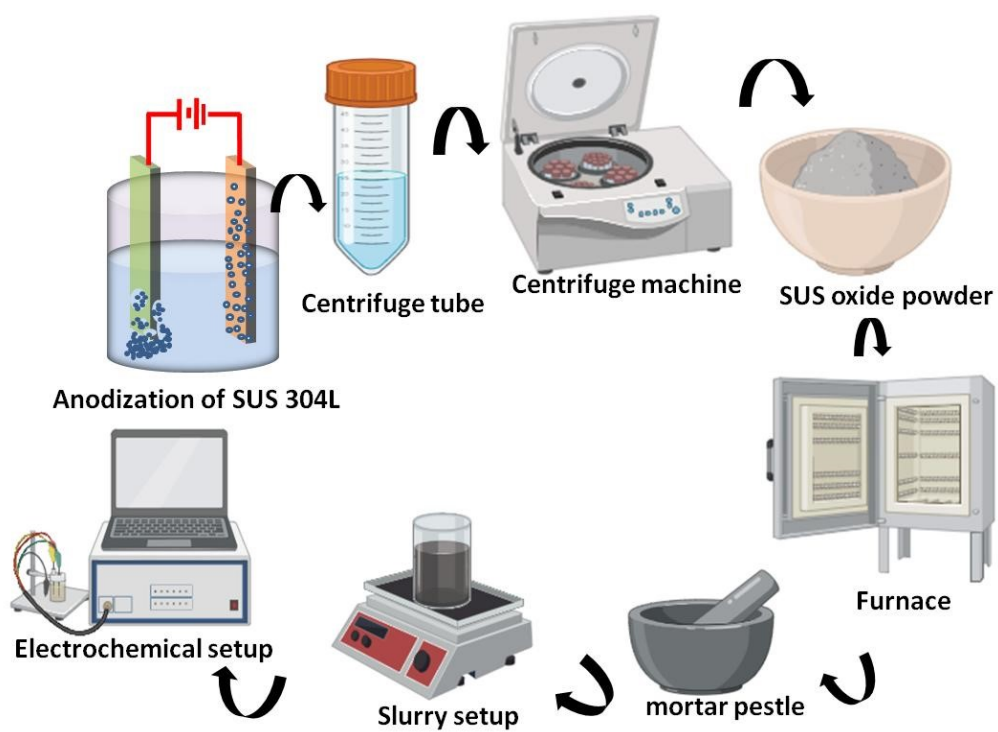

**Fig. S1:** Schematic illustration of SUS-304L oxide nanostructure synthesis via anodization and the electrochemical setup.

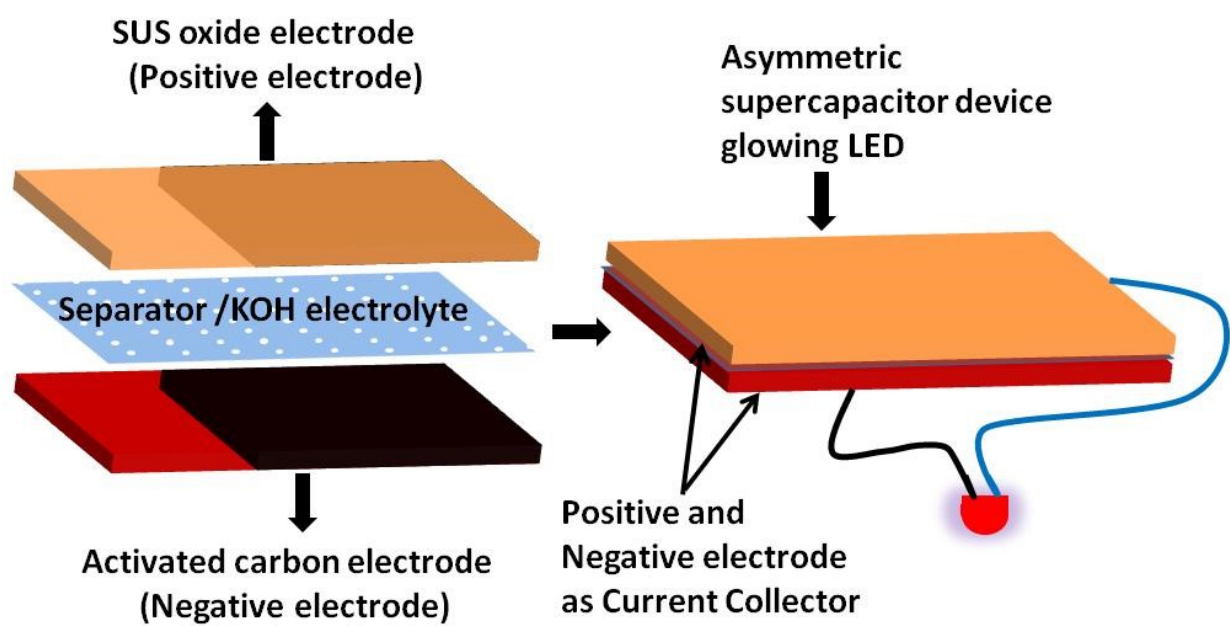

**Fig. S2:** Schematic diagram of the fabricated device.

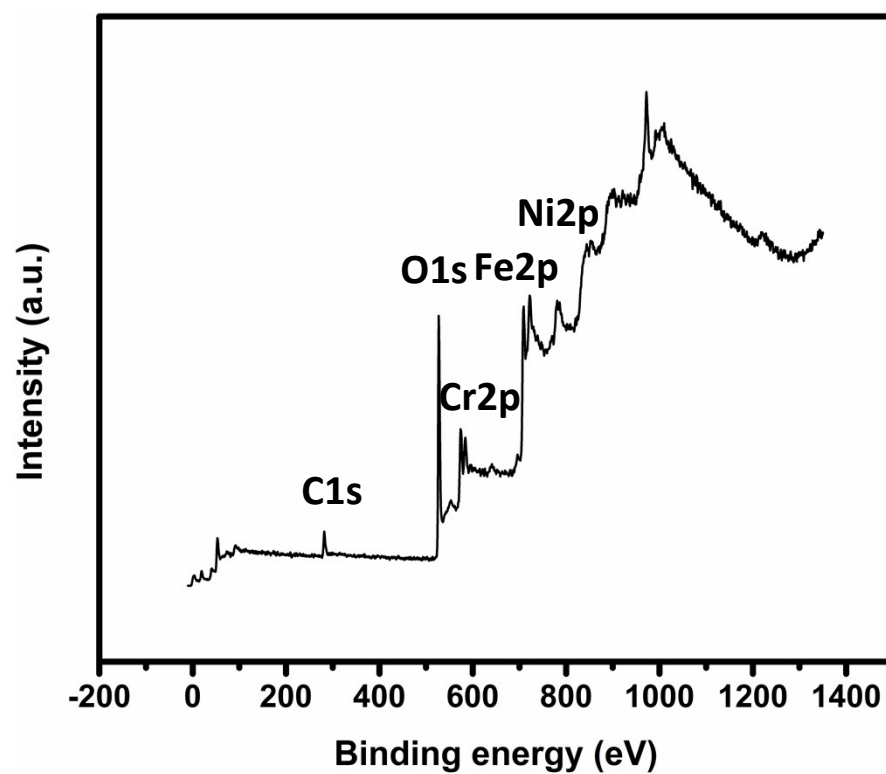

**Fig. S3:** XPS survey spectrum of SUS-304L oxide nanostructure.

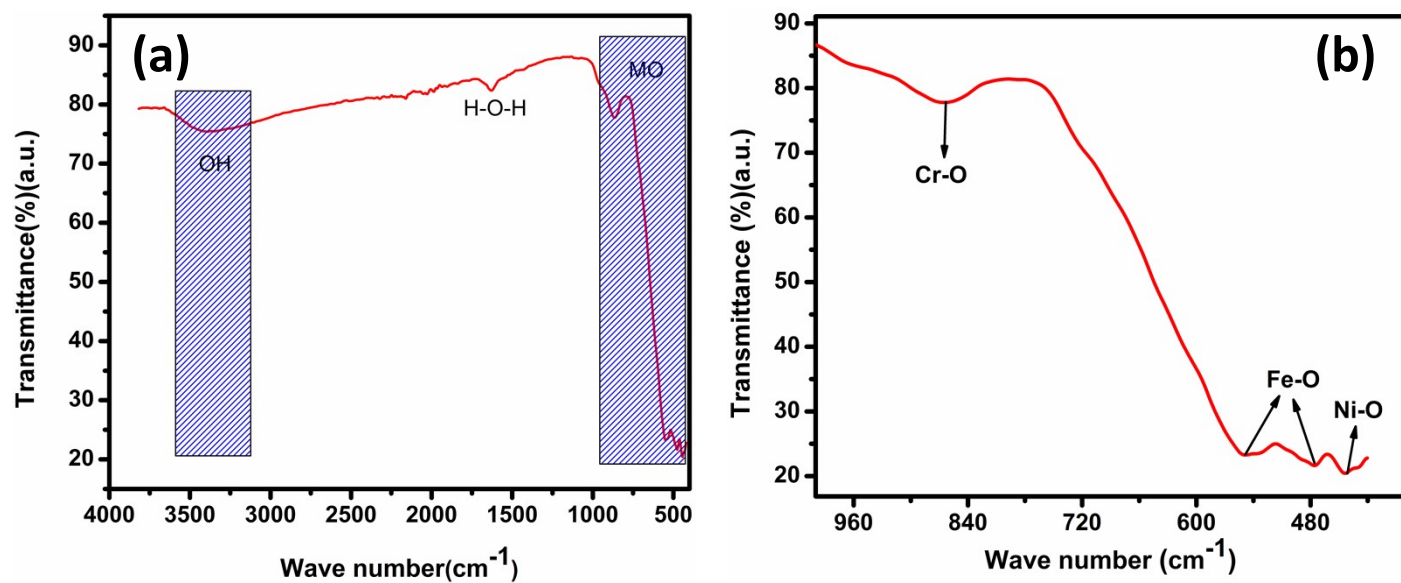

**Fig. S4:** FTIR spectrum of SUS-304L oxide nanostructure.
